# Supplementary material
Source: publisher site journal article supplement (https://www.dovepress.com/article/230129)
Supplement: Supplementary file 1 [file get_supplementary_file.php]

**Supplementary Table 1.** Neonatal outcomes of live-born infants by regimen group

|  | Singletons |  |  |  | Twins |  |  |
| --- | --- | --- | --- | --- | --- | --- | --- |
|  | DYG + hMG | MPA + hMG | *P*-value |  | DYG + hMG | MPA + hMG | *P*-value |
| No. of children | 47 | 112 |  |  | 40 | 126 |  |
| Gestational age (weeks) | 38.5 ± 1.4 | 38.5 ± 1.5 | 0.921 |  | 34.8 ± 3.1 | 35.2 ± 2.8 | 0.438 |
| Birthweight (g) | 3351.9 ± 548.8 | 3319.6 ± 487.6 | 0.482 |  | 2330.4 ± 538.2 | 2334.0 ± 576.5 | 0.979 |
| Length at birth (cm) | 49.9 ± 1.2 | 50.1 ± 2.0 | 0.418 |  | 47.4 ± 4.0 | 46.7 ± 4.4 | 0.089 |
| Adverse neonatal outcomes, *n* (%) |  |  |  |  |  |  |  |
| Early neonatal death | 0 (0) | 1 (0.9) | 1.000 |  | 0 (0) | 2 (1.6) | 1.000 |
| Preterm birth (<37 weeks) | 3 (6.4) | 7 (6.2) | 1.000 |  | 24 (60.0) | 74 (58.7) | 0.887 |
| Low birthweight (<2500 g) | 3 (6.4) | 3 (2.7) | 0.508 |  | 20 (50.0) | 65 (51.6) | 0.861 |
| Major congenital malformations | 0 (0) | 1 (0.9) a | 1.000 |  | 1 (2.5) b | 4 (3.1) c | 1.000 |

**Note:** Data are presented as mean ± standard deviation or number (percentage). a. atrial septal defect (*n* = 1). b. congenital megacolon (*n* = 1). c. anencephaly (*n* = 1); atrial septal defect (*n* = 1); esophageal atresia (*n* = 1); polydactyly (*n* = 1).

**Abbreviations:** hMG, human menopausal gonadotropin; DYG, dydrogesterone; MPA, medroxyprogesterone acetate.





**Supplementary Figure 1** Distribution of propensity scores before and after matching for (A) DYG + hMG and (B) MPA + hMG protocols. **Abbreviations:** DYG, dydrogesterone; hMG, human menopausal gonadotropin; MPA, medroxyprogesterone acetate.
